20 **ABSTRACT**

21 Fatty acids (FAs) constitute a considerable fraction of all lipid molecules with a  
22 fundamental role in numerous physiological processes. In animals, the majority of  
23 complex lipid molecules are derived from the transformation of FAs through several  
24 biochemical pathways. Yet, for FAs to enroll in these pathways they require an  
25 activation step. FA activation is catalyzed by the rate limiting action of Acyl-CoA  
26 synthases. Several Acyl-CoA enzyme families have been previously described and  
27 classified according to the chain length of FA they process. Here, we address the  
28 evolutionary history of the ACSBG gene family which activates, FA with more than 16  
29 carbons. Currently, two different ACSBG gene families, *ACSBG1* and *ACSBG2*, are  
30 recognized in vertebrates. We provide evidence that a wider and unequal *ACSBG* gene  
31 repertoire is present in vertebrate lineages. We identify a novel *ACSBG-like* gene  
32 lineage which occurs specifically in amphibians, ray finned fish, coelacanth and  
33 chondrichthyes named *ACSBG3*. Also, we show that the *ACSBG2* gene lineage  
34 duplicated in the Theria ancestor. Our findings, thus offer a far richer understanding on  
35 FA activation in vertebrates and provide key insights into the relevance of comparative  
36 and functional analysis to perceive physiological differences, namely those related with  
37 lipid metabolic pathways.

## 38 1. INTRODUCTION

39 Lipids represent a complex group of biomolecules present in all living organisms,  
40 playing a key role in numerous biological processes, such as inflammatory response,  
41 reproduction, biological membranes and energy sourcing and storage. Additionally,  
42 they participate in the overall the homoeostasis as signal molecules, cofactors, and  
43 endogenous ligands for nuclear receptors (Wall et al., 2010; Robinson and Mazurak,  
44 2013; Grygiel-Górniak, 2014). Aside from sterol lipids, all remaining lipids are obtained  
45 from the endogenous elaboration of fatty acid (FA) molecules (Watkins et al., 2007).  
46 Yet, for FAs to enroll in any anabolic and catabolic process they require an activation  
47 step. Thus, FA activation is a critical rate limiting step of FA metabolism. FA activation  
48 was first recognized in 1948 and referred to as “sparking” or “priming” (Grafflin and  
49 Green, 1948; Knox et al., 1948). This enzymatic step consists of a two-step  
50 thioesterification reaction catalyzed by Acyl-CoA synthetase (ACS), resulting in a  
51 thioester with coenzyme A (CoA) (Watkins et al., 2007).

52 Several ACS involved in FA activation have been previously identified and organized  
53 according to the degree of unsaturation and chain length of the FAs favored as  
54 substrate: the short-chain ACS-Family (*ACSS*), medium-chain ACS-Family (*ACSM*), long-  
55 chain ACS-Family (*ACSL*), very long-chain ACS-Family (*ACSVL*), Bubblegum ACS-Family  
56 (*ACSBG*) and ACSFamily (*ACSF*) (Watkins et al., 2007; Soupene and Kuypers, 2008).  
57 Although some substrate preference overlap is observed, these enzymes also differ in  
58 tissue distribution and subcellular location, an indication of their highly specific role in  
59 FA metabolism (Watkins et al., 2007). ACS enzymes have been found to have a wide  
60 taxonomic distribution, with homologues ranging from Eubacteria to Plants and  
61 Metazoa, a clear indication of their pivotal role in lipid metabolism (Hisanaga et al.,  
62 2004; Soupene and Kuypers, 2008).

63 Despite their wide taxonomic occurrence, the genetic repertoire of ACS has been found  
64 to vary, namely in vertebrates (Castro et al., 2012; Lopes-Marques et al., 2013). For  
65 example, some studies have disclosed that both *ACSL* and *ACSS* gene family  
66 composition and function were shaped by events of gene/genome duplication in  
67 combination with differential loss. Moreover, multi-genome comparisons across a wide  
68 range of vertebrate species revealed novel and previously uncharacterized ACS

69 enzymes (Castro et al., 2012; Lopes-Marques et al., 2013). The present work seeks to  
70 build on previous findings and further extend, the knowledge regarding the genetic  
71 repertoire and distribution ACS in vertebrates namely the ACS *Bubblegum* (ACSBG)  
72 gene family.

73 ACSBG enzymes, also known as lipidosin, activate FA with C16 to C24 (Moriya-Sato et  
74 al., 2000; Steinberg et al., 2000; Pei et al., 2003). Presently, 2 members of the ACSBG  
75 gene family have been identified and characterized in mammals, ACSBG1 and ACSBG2  
76 (Pei et al., 2003; Watkins et al., 2007). Similarly, to the previously described ACS  
77 enzymes, both ACSBG members display conserved sequence motifs, such as the  
78 putative ATP-AMP signature motif for ATP binding (Motif I) and a motif for FA binding,  
79 characteristic of the ACS gene family (Motif II) (Moriya-Sato et al., 2000; Watkins et al.,  
80 2007). Notably, all known ACS, with the exception of human ACSBG2, contain a highly  
81 conserved arginine (Arg-R) in Motif II (Pei et al., 2006). The replacement of this Arg by  
82 histidine (His-H) in Human ACSBG2 was found to confer a biphasic pH optimum (pH 6.5  
83 and pH 7.5) to the enzyme, in contrast to the monophasic activity at pH 7-7.5 of the  
84 mouse orthologue (Pei et al., 2006). Yet, due to the degree of conservation of both  
85 Motifs I and II, these have previously been used to seek and identify potential ACS  
86 enzymes (Steinberg et al., 2000; Watkins et al., 2007).

87 ACSBG enzymes have been suggested to play a significant role in brain development  
88 and reproduction (Moriya-Sato et al., 2000; Tang et al., 2001; Pei et al., 2006). Previous  
89 reports with the *D. melanogaster* bubblegum mutant (termed bubblegum due to the  
90 bubbly appearance of the lamina, a result of neurodegeneration and dilation of the  
91 photoreceptor axons) and mouse, associated the disruption of *ACSBG1* to X-linked  
92 adrenoleukodystrophy (X-ALD) (Min and Benzer, 1999; Moriya-Sato et al., 2000). X-ALD  
93 is characterized by the accumulation of high levels of very long FA in plasma and  
94 tissues, accompanied by neurodegeneration (Min and Benzer, 1999; Moriya-Sato et al.,  
95 2000; Moser et al., 2002). On the other hand, *ACSBG2* plays an important role in  
96 spermatogenesis and testicular development, being associated to male infertility  
97 (Zheng et al., 2005; Fraisl et al., 2006). In agreement gene expression of *ACSBG1* is  
98 found to be mainly restricted to brain, adrenal gland, gonads, spleen in mouse and  
99 human (Moriya-Sato et al., 2000). In contrast, *ACSBG2* showed a more exclusive

100 expression pattern being highly expressed in the testis, followed by medulla and spinal  
101 cord (Pei et al., 2006) .

102 Here, using a combination of phylogenetics, comparative genomics and gene  
103 expression analysis we deduced the evolutionary history of the *ACSBG* gene family in  
104 all major vertebrate lineages. Our findings illustrate the importance of comparative  
105 analysis to address the role of adaptive evolution in the shaping of lipid metabolic  
106 modifications between lineages.

## 107 **2. MATERIALS & METHODS**

### 108 **2.1. DATABASE SEARCH AND PHYLOGENETIC ANALYSIS**

109 NCBI GenBank release 220 June and release 221 August 2017 and Ensembl release 89  
110 May and release 90 August 2017, databases were searched using tblastn and blastp to  
111 recover ACSBG-like sequences using human ACSBG1 (NP\_055977) and ACSBG2  
112 (NP\_112186) amino acid sequences as query. All major vertebrate lineages such as  
113 mammals, birds, reptiles, amphibians, coelacanths, teleost fish, cartilaginous fish and  
114 cyclostomes were searched. Additionally, the following invertebrate lineages basal to  
115 chordates were also explored cephalochordates, hemichordates, Mollusca  
116 (Supplementary material 1).

117 Our search retrieved 121 ACSBG-like sequences; sharing a minimum 70% pairwise  
118 identity with corresponding query sequence for mammals; 60% for bird's reptiles and  
119 amphibians; 50% identity for teleost's and chondrichthyes and finally 40% identity for  
120 invertebrates. The collected sequences were aligned and inspected with partial  
121 sequences being removed, leaving a 119 full ORF or near full ORF sequences for  
122 phylogenetic analysis (Supplementary material 1). Amino acid sequences were aligned  
123 in MAFFT with the L-INS-I method (Kato et al., 2005; Kato and Toh, 2008). In the  
124 resulting alignment, all columns containing 90% gaps were stripped leaving a total of  
125 787 positions for phylogenetic analysis. A second sequence alignment containing 121  
126 ACSBG-like sequences including the truncated sequences of *Xenopus tropicalis* and  
127 *Xenopus leavis* was performed using the same method leaving a total of 788 positions  
128 for phylogenetic analysis. Both alignments were then individually submitted to  
129 PhyML3.0 server (Guindon et al., 2010), with evolutionary model determined  
130 automatically, resulting in the selection JTT+G+I in both cases. The branch support for  
131 phylogenetic trees was calculated using aBayes. The resulting trees were visualized and  
132 edited in Fig. Tree V1.3.1 available at <http://tree.bio.ed.ac.uk/software/figtree/> and  
133 rooted with the invertebrate sequences.

134

### 135 **2.2. SYNTENY AND PARALOGY ANALYSIS**

136 Using as reference the human and teleost *ACSBG loci*, synteny maps of the genomic  
137 neighbourhoods of the *ACSBG1*, *ACSBG2* and *ACSBG3* gene were assembled in a set of

138 species representative of the major lineages analysed. The following genome  
139 assemblies available in NCBI were accessed for *Homo sapiens* - GCF\_000001405.33,  
140 *Monodelphis domestica* - GCF\_000002295.2, *Gallus gallus* - GCF\_000002315.4,  
141 *Pelodiscus sinensis* - GCF\_000230535.1, *X. tropicalis* - GCF\_000004195.3, *X. laevis* -  
142 GCF\_001663975.1, *Latimeria chalumnae* - GCF\_000225785.1, *Oryzias latipes* -  
143 GCA\_000313675.1, *Astyanax mexicanus* - GCA\_000372685.2, *Danio rerio* -  
144 GCA\_000002035.4, *Lepisosteus oculatus* - GCA\_000242695.1, *Callorhinchus milii* -  
145 GCA\_000165045.2, *Branchiostoma floridae* - GCA\_000003815.1 and *S. kowalevskii* -  
146 GCF\_000003605.2. For *Tetraodon nigroviridis* and *Petromyzon marinus* genome  
147 assemblies TETRAODON 8.0, Mar 2007 and Pmarinus\_7.0, Jan 2011 available in  
148 Ensembl were accessed. Paralogy analysis of the *ACSBG locus* was conducted using the  
149 reconstructed ancestral chordate genome as described in (Putnam et al., 2008).

150

### 151 **2.3. RNA ISOLATION AND ASCBG TISSUE EXPRESSION PANEL IN *X. TROPICALIS***

152

153 *X. tropicalis* (African clawed frog) tissues (brain, skin, heart, liver, spleen, pancreas,  
154 kidney, intestine, testis and ovary) were kindly provided by O. Brochain (CNRS, Orsay).  
155 Total RNA was purified using the Illustra RNAspin Mini RNA Isolation Kit animal tissues  
156 protocol (GE Healthcare) with on-column DNase I digestion. RNA quality was assessed  
157 by electrophoresis and its concentration determined using a microplate  
158 spectrophotometer (Take 3 and Synergy HT Multi-Mode Microplate Reader, Biotek).  
159 First-strand cDNA was synthesized from 250ng RNA using the iScript™ cDNA Synthesis  
160 Kit (Bio-Rad), according to the manufacturer's instructions.

161 Forward and reverse primers sets were designed to flank an intron and to avoid  
162 genomic DNA amplification. Primers sets were created for the following genes *ACSBG1*  
163 - Forward-5' TTTGCCAGGATGTTGGAAGT3', Reverse-5' AAAGCTTCCACGTGCTCTGT 3',  
164 annealing at 57°; *ACSBG2* - Forward-5' CTTTTCTGGGGACGTCATGT 3', Reverse-5'  
165 TTGGAACCTGCTCTTTGAGG 3', annealing at 55° and *ASCGB3* - Forward-5'  
166 TGCAGTCTTTGCTACGTTGG 3' reverse-5' ACAACAGAGCTCCCCTGTG 3', annealing at  
167 57°. To assess the quality of *X. tropicalis* cDNA two sets of primers targeting  
168 housekeeping genes were included for  $\beta$ -actin – Forward-5' GGTCGCCCAAGACATCAG3',  
169 Reverse-5' GCATACAGGGACAACACA annealing at 57° and for *EEF1A1* – Forward-

170 5'TCGTTAAGGAAGTCAGCACAA3' and Reverse5'CATGGTGCATTTCAACAGAT3' annealing  
171 at 57°. PCR reactions were all performed using 2 µl of *X. tropicalis* cDNA and Phusion®  
172 Flash high-fidelity Master Mix (FINNZYMES). PCR parameters were as follows: initial  
173 denaturation at 98°C for 10 s, followed by 30 cycles of denaturation at 98°C for 1 s,  
174 annealing for 5 s and elongation at 72°C for 10s and a final step of elongation at 72°C  
175 for 1 min. PCR products were then loaded onto 2% agarose gel stained with GelRed and  
176 run in TBE buffer at 80 V.

177

178

179

#### 180 **2.4. ACSBG EXPRESSION ANALYSIS THROUGH RNA-SEQ**

181 The RNA-Seq analysis was performed using a collection of tissues datasets from seven  
182 species Human (*H. sapiens*), mouse (*M. musculus*), chicken (*G. gallus*), western clawed  
183 frog (*X. tropicalis*), zebrafish (*D. rerio*), spotted gar (*L. oculatus*) and elephant shark (*C.*  
184 *mili*), available in National Centre for Biotechnology (NCBI) Sequence Read Archive  
185 (SRA) (<https://www.ncbi.nlm.nih.gov/sra/>) (Supplementary material 2). To standardize  
186 datasets from different sources, all files were converted to FASTQ file format and  
187 sequence quality trimming was performed using Trimmomatic v 0.36 (Bolger et al.,  
188 2014). Reads with 36bp in length and an average score of 20 phred were selected for  
189 further analysis.

190 Reference sequences and respective annotation files of each specie were collected  
191 from NCBI and Ensembl (Release 89) (Yates et al., 2016) (supplementary material 3).  
192 For both elephant shark and western clawed frog the reference sequences for RNAseq  
193 mapping were retrieved from NCBI (<ftp://ftp.ncbi.nih.gov/genomes/refseq/>), while for  
194 the remaining species the reference sequences for mapping were retrieved from  
195 Ensembl database (<ftp://ftp.ensembl.org/pub/release-89/>) (Supplementary material  
196 3). Trimmed and groomed reads from each dataset were mapped to their respective  
197 reference using Bowtie2 (Langmead and Salzberg, 2012), and the transcript  
198 quantification was calculated in transcript per million (TPM), with RSEM v.1.2.31  
199 software (Li and Dewey, 2011). TPM values for each gene were taken as evidence of  
200 relative gene expression, low TPM values (< 0.5) were considered unreliable and



201 substituted with zero. To complete this exploratory gene expression analysis, the TPM  
202 values were  $\log_2$ -transformed after adding a value of one.

### 203 3. RESULTS AND DISCUSSION

#### 204 3.1. DATABASE MINING AND PHYLOGENETIC ANALYSIS REVEALS NOVEL MEMBERS ACSBG GENE 205 FAMILY

206 Initial blast searches identified ACSBG-like sequences and recovered a larger than  
207 anticipated number of sequence hits. ACSBG1 and ACSBG2-like sequences were found  
208 in species from the following vertebrate lineages: mammals, birds, reptiles,  
209 amphibians, holostei, coelacantiforms and teleostei. In chondrichthyans and  
210 cyclostomes no ACSBG1-like sequences were retrieved. Moreover, an additional  
211 uncharacterized ACSBG2-like sequence was also retrieved in some mammalian species.  
212 Database searches also recovered a novel set of ACSBG-like sequences in four  
213 gnathostome lineages: amphibians (Western clawed frog and African clawed frog)  
214 chondrichthyans (elephant shark), holostei (spotted gar), coelacantiforms (coelacanth)  
215 and teleostei. However, amphibian sequences were considerably shorter than the  
216 remaining ACSBG, thus being excluded from the main phylogenetic analysis.

217 To disclose the orthology of these various sequences a phylogenetic analysis was  
218 performed. The resulting tree topology displays 3 well supported clades in vertebrates.  
219 The first group contained all ACSBG1 sequences from mammals, reptiles, birds,  
220 amphibians, coelacanths and teleost fish, with no representatives of chondrichthyes and  
221 cyclostomes. Besides the ACSBG1 clade, we find a sister clade comprising ACSBG2  
222 sequences. This contains ACSBG2 previously described in mammals (ACSBG2a) and an  
223 uncharacterized ACSBG2-like (ACSBG2b) identified in the present work. The tree  
224 topology suggests that the both mammalian ACSBG2 sequences are related by a  
225 duplication event that took place in the ancestor of Theria. Out grouping the  
226 mammalian ACSBG2 sequences we find the ACSBG2 sequences from birds, reptiles,  
227 amphibians, coelacanths, chondrichthyes, teleost fish and cyclostomes. Thus, *bona fide*  
228 orthologues of ACSBG2 are represented across all major vertebrate classes. Within the  
229 third clade, we find a novel uncharacterized group of ACSBG sequences which have  
230 sequence representatives in coelacanths, teleost fish, holostei and chondrichthyes. We  
231 name this novel sequence ACSBG3. Finally, placed basally to all vertebrate sequences  
232 we find invertebrate ACSBG sequences. The present tree topology provides robust  
233 indications that the diversification of the ACSBG gene family occurred in the vertebrate

234 ancestor. A second phylogenetic analysis was run separately to include the  
235 uncharacterized short *Xenopus sp.* ACSBG sequences (Supplementary material 4).  
236 Although the overall tree topology is conserved with the main analysis (Fig. 1), we find  
237 that the *Xenopus sp.* ACSBG sequences are placed basally to all vertebrate clades  
238 hindering the identification of their orthology. This placing of *Xenopus sp.* ACSBG-like  
239 sequences correlates to the highly divergent nature observed in the sequence  
240 alignment, with these amphibian sequences being considerably shorter and displaying  
241 a poor conservation of the AMP-binding motif (see section 3.3).  
242 Additionally, we find that mammalian ACSBG2a and 2b sequences are placed in long  
243 branches in both phylogenetic analysis (Fig.1 and Supplementary material 4) suggesting  
244 an accelerated evolution and divergence of these sequences further analysed in section  
245 3.3.

246

### 247 **3.2. A NOVEL ACSBG GENE, ACSBG3, IS AN OHNOLOG GONE MISSING IN AMNIOTES**

248 Phylogenetic analysis suggests that the ACSBG gene family expanded in the vertebrate  
249 ancestor. This time frame coincides with the proposed timing of two round of whole  
250 genome duplication (2R WGD) in the ancestral vertebrate approximately 500MYA  
251 (Ohno, 1970; Dehal and Boore, 2005). Yet, while it is generally accepted that all  
252 gnathostomes underwent the 2R-WGD, the extent of these genome duplications in  
253 cyclostomes still remains a matter of debate (Smith and Keinath, 2015).

254 To complement the phylogenetic analysis, validate events of gene duplication/loss,  
255 resolve the orthology of the *Xenopus sp.* uncharacterized ACSBG and the origin of  
256 ACSBG3 sequences, the genomic *locus* of each *Acsbg* gene was examined in a set of  
257 representative species (Fig. 2). Comparative synteny analysis of the ACSBG1 *locus*  
258 reveals a high degree of conservation of neighbouring gene families throughout all the  
259 analysed lineages (Fig.2A). ACSBG1 is localized in human chromosome 15, being  
260 flanked by gene families such as the *IDH3A*, *CIB2*, *WDR61* and *CRABP1*. These flanking  
261 gene families are also present in the vicinity of ACSBG1 *locus* in the all analysed  
262 lineages (Fig. 2A). In the case of *C. milii* although no ACSBG1 gene was found, synteny  
263 analysis reveals that the *locus* organization is conserved, suggesting gene loss in this  
264 lineage (Fig. 2A). Regarding the cyclostomes, extensive blast searches did not retrieve  
265 an ACSBG1 sequence; synteny analysis uncovered a fragmented *locus* segregated into

266 at least two distinct scaffolds. Therefore, the absence of this gene in cyclostomes may  
267 be attributed to poor genome coverage or to gene loss (Fig. 2A).

268 The human ACSBG2 gene resides in chromosome 19 and is flanked by the following  
269 gene families: *RFX2*, *RANBP3*, *MLLT1* and *ACER1*. The *locus* architecture is conserved in  
270 all species analysed. In cyclostomes, the *ACSBG2 locus* is disjointed and distributed  
271 among several scaffolds thus the absence of ACSBG2 in cyclostomes remains similarly  
272 to ACSBG1 unresolved (Fig. 2B). In the case of mammalian duplicates, we find that  
273 *ACSBG2a* and *ACSBG2b* are located side by side in the *M. domestica*. Synteny analysis  
274 of this *locus* in other mammals presenting both *ACSBG2a* and *2b* (data not shown) is  
275 coincident with the observation for *M. domestica* supporting the hypothesis that  
276 *ACSBG2a* and *2b* arose through tandem duplication in the ancestor of therian  
277 mammals, with ACSBG2b being later lost in Haplorhini. Finally, we find that in the  
278 *ACSBG3 locus*, despite the lesser conservation, some neighbouring gene families such  
279 as *HINT2*, *SPAG8*, *RGP1* and *GBA2* are preserved in the majority of the analysed  
280 lineages. Using these conserved neighbouring gene families, the corresponding *locus*  
281 was mapped in birds and mammals to address the loss of *ACSBG3* in these lineages  
282 (Fig. 2C). ACSBG3 is also absent in reptiles and the analysis of the *locus* revealed that it  
283 is fragmented in various species examined (*Anolis carolinesis*, *Thamnophis sirtalis*,  
284 *Alligator mississippiensis* and *Chrysemys picta*), hindering the validation of ACSBG3 loss  
285 in this lineage.

286 We next investigated the synteny maps for the single ACSBG *locus* from two  
287 invertebrate cephalochordates. Here we find that the *B. floridae locus* retains a  
288 conserved gene family arrangement, namely with the presence of *HERC1-like* gene,  
289 whose orthologue is found in the vicinity of vertebrate *ACSBG1* (Fig. 2 A and D  
290 indicated in red). Similarly, the hemichordate *S. kowalevskii* also displays a conserved  
291 neighbouring gene family, *CHRNA3* with the vertebrate orthologue placed in the  
292 *ACSBG1 locus* (Fig. 2A and D indicated in red). Finally, to address the hypothesis that  
293 ACSBG gene expansion took place with the 2R WGD the location of ACSBG and  
294 neighbouring genes (with described paralogues underlined genes in Fig.2A, B, C and D)  
295 were mapped to the predicted ancestral paralogons as described by Putnam *et al* 2008  
296 (Putnam et al., 2008). Next, ancestral paralogons were mapped back to the same  
297 ancestral linkage group, LG2 (Putnam et al., 2008) indicating that the *ACSBG loci* are

298 related by genome duplication, strongly suggesting that vertebrate ACBG diversity  
299 arose with the 2R WGD (Fig. 2 F).

300

### 301 **3.3. SEQUENCE ANALYSIS AND GENE EXPRESSION**

302 To further characterize the novel *ACSBG2b* and *ACSBG3* a sequence alignment was  
303 performed to inspect the typical ACS enzyme motifs (Watkins et al., 2007). The analysis  
304 of this alignment revealed that the predicted AMP-binding domain (Motif I Fig. 3A and  
305 3B), a highly conserved motif in all ACS enzymes from bacteria to humans (Black et al.,  
306 1997; Steinberg et al., 2000; Weimar et al., 2002; Karan et al., 2003), is conserved in  
307 the vast majority of the sequences collected with the exception of the novel *ACSBG2b*  
308 (Fig.3B) and the *ACSBG3* sequence in *Xenopus sp.*(see Supplementary material 5 for  
309 alignment of the full 121 sequences). An indication that residues within Motif I play a  
310 fundamental role in ACS catalytic activity was found in previous studies were the  
311 mutation of residues within Motif I (positions 1, 2, 4, 5 and 10) in *E. coli* considerably  
312 reduced the catalytic activity, while the replacement of residues 1 and 5 in *S. cerevisiae*  
313 resulted in a minor reduction of enzymatic activity (Fig. 3A grey arrows) (Weimar et al.,  
314 2002; Zou et al., 2002). Thus, the low conservation of this motif in the mammalian-  
315 specific *ACSBG2b* strongly suggests that these enzymes may show an alternative  
316 function or *modus operandi*. In the analysis of the *Xenopus sp.* *ACSBG3*, we find that  
317 this motif differs from the remaining *ACSBG3* identified, being disrupted with the  
318 deletion of 3bp (Supplementary material 5). Again, this observation suggests an  
319 alternative role for the enzyme given that AMP binding is essential for FA activation.  
320 Regarding Motif II, also known as the ACS signature-motif and proposed to be involved  
321 in acyl chain length specificity (Black et al., 1997), we find that again *ACSBG2b* displays  
322 a divergent sequence when compared to the remaining *ACSBG* analysed here.  
323 Interestingly, we observe that *ACSBG2b* presents an Asparagine residue (Asn-N) instead  
324 of the highly conserved Arginine (Fig. 3A and B black arrow). Notably, human *ACSBG2a*  
325 harbours a Histidine in this position, representing the single case described to date of  
326 an *ACSBG* without an Arginine (Pei et al., 2006). Reverse mutation of the Histidine  
327 within Motif II in human *ACSBG2a* showed that this residue assumes a critical role in  
328 determining the optimal pH for this enzyme (Pei et al., 2006). Additionally, this

329 replacement (Asn) is only observed for placental mammals, with marsupials retaining  
330 the conserved Arginine (Fig 3 B). Next, Motif V (KXX(R,K) is a conserved motif found in  
331 several members of the ACS enzymes families and contains a conserved K- Lys  
332 demonstrated to be essential for the catalytic function of ACS in *S. enterica* propionyl-  
333 coA synthetase and ACS activity of murine ACSF2 (Horswill and Escalante-Semerena,  
334 2002). Here we find that Motif V is conserved in all recovered ACSBG sequences with  
335 the exception of *Xenopus sp* ACSBG3 due to the short nature of these sequences (see  
336 Supplementary material 5). Finally, the Motifs III and IV, identified by Hisanaga *et al*  
337 2008 (Hisanaga et al., 2004), are found to be conserved in the majority of analysed  
338 sequences, with the exception of a conservative replacement in Motif IV in ACSBG2b.  
339 The highly conserved Histidine is replaced by biochemically similar residue, tyrosine,  
340 having a minor or no predicted impact.

341 In an attempt to infer the function of the newly identified *ACSBG2b* and *ACSBG3*, and  
342 address the retention of these genes in a restricted number of lineages, we next  
343 performed an expression analysis using available RNA-Seq SRAs (Fig. 3C). Similarly, to  
344 previous reports (Moriya-Sato et al., 2000; Tang et al., 2001; Pei et al., 2006), relative  
345 expression profiles reveal that *ACSBG1* expression is mainly limited to brain and  
346 gonads, with the exception of *D. rerio* for which the liver stands as the main expression  
347 site. On the other hand, the expression profile of non-mammalian vertebrate *ACSBG2*  
348 was found to be more extensive than in mammals (Pei et al., 2006) with expression  
349 detected in all analysed tissues of *C. milli*, *D. rerio*, *L. oculatus*, *G. gallus*, and *X.*  
350 *tropicalis*. Interestingly, the expression analysis of mammalian specific duplicates  
351 *ACSBG2a* and *ACBG2b* shows a confined expression of the duplicates essentially in  
352 testis, with a relatively low expression of *ACSBG2a* detected in human kidney.  
353 Regarding the gene expression profile of *ACSBG3* in *X. tropicalis*, *L. oculatus*, and in  
354 *ACSBG3a* of *C. milli*, we find a localized and high relative expression in ovary and in  
355 testis. Semi-quantitative PCR expression analysis of ACSBG3 from *X. tropicalis* is in  
356 accordance with *in silico* RNAseq analysis (Fig. 3D), with ACSBG1 expression confined  
357 to brain and testis, while ACSBG2 is detected all tissues except ovary and finally  
358 ACSBG3 being restricted to testis and brain (Fig. 3D).

359 High expression of *ACSBG3* in gonads is indicative that this enzyme may play an  
360 important role in reproduction similarly to the role of *ACSBG2* (Pei et al., 2006). Finally,  
361 for *ACSBG3* in *C. milii* no expression was detected in any of the analysed tissues.

362

### 363 **3.4. Evolutionary history of ACSBG gene family**

364 Using a multi-comparative approach, including database searches, phylogenetic and  
365 synteny analysis we have uncovered a larger than anticipated genetic repertoire of  
366 *ACSBG* genes in vertebrates. We find that the initial expansion of the *ACSBG* gene  
367 family from which arose *ACSBG1* *ACSBG2* and *ACSBG3* is coincident with the 2R WGD,  
368 with representative gene orthologues present in several gnathostome lineages (Fig. 4).  
369 The detailed analysis of the *ACSBG* gene repertoire revealed a differential retention of  
370 *ACSBG3*, with this paralogue being lost in birds, mammals and possibly in reptiles,  
371 while being retained in teleosts, amphibians and chondrichthyes. The identification of  
372 additional *ACSBG* enzymes in teleosts correlates with previous studies, where  
373 differential paralogue retention led to the maintenance of extra ACS enzyme  
374 paralogues, namely *ACSL2* and *ACSS1b* in teleosts (Fraisl et al., 2006; Wall et al., 2010).  
375 The preservation of duplicated genes is often observed when the corresponding  
376 transcript, in this case ACS, is in high demand (Zhang, 2003). Thus, one may  
377 hypothesize that the preservation of additional ACS duplicates in teleosts is a means to  
378 fulfil a high demand of FA activation given that FA oxidation is considered to be the  
379 main energy source in this lineage (Tocher, 2003). Finally, further duplications were  
380 observed in the ancestor of mammals with the tandem duplication of *ACSBG2* and also  
381 in specific lineages such as the *ACSBG3* in *C. milii* and *T. nigroviridis* and *ACSBG1* *L.*  
382 *chalumnae* (Fig. 4).

### 383 **4. CONCLUSION**

384

385 Our findings suggest that FA activation metabolic modules, including the *ACSBG* gene  
386 family, have significantly diversified upon vertebrate radiation as a consequence of  
387 genome duplication, lineage specific duplication and losses.

388

389

390 **ACKNOWLEDGMENTS**

391 This work was supported by Project INNOVMAR—Innovation and Sustainability in the  
392 Management and Exploitation of Marine Resources (reference NORTE-01-0145-FEDER-  
393 000035, within Research Line NOVELMAR/INSEAFOD/ECOSERVICES), supported by  
394 North Portugal Regional Operational Programme (NORTE 2020), under the PORTUGAL  
395 2020 Partnership Agreement, through the European Regional Development Fund  
396 (ERDF). We acknowledge Fundação para a Ciência e a Tecnologia for the support to EF  
397 (SFRH/BD/79305/2011).

398



399 **REFERENCES**

400

401

402 Black, P.N., Zhang, Q., Weimar, J.D. and DiRusso, C.C., 1997. Mutational Analysis of a Fatty Acyl-  
403 Coenzyme A Synthetase Signature Motif Identifies Seven Amino Acid Residues That  
404 Modulate Fatty Acid Substrate Specificity. *Journal of Biological Chemistry* 272, 4896-  
405 4903.

406 Bolger, A.M., Lohse, M. and Usadel, B., 2014. Trimmomatic: a flexible trimmer for Illumina  
407 sequence data. *Bioinformatics* 30, 2114-20.

408 Castro, L.F.C., Lopes-Marques, M., Wilson, J.M., Rocha, E., Reis-Henriques, M.A., Santos, M.M.  
409 and Cunha, I., 2012. A novel Acetyl-CoA synthetase short-chain subfamily member 1  
410 (Acss1) gene indicates a dynamic history of paralog retention and loss in vertebrates.  
411 *Gene* 497, 249-255.

412 Dehal, P. and Boore, J.L., 2005. Two Rounds of Whole Genome Duplication in the Ancestral  
413 Vertebrate. *PLOS Biology* 3, e314.

414 Fraisl, P., Tanaka, H., Forss-Petter, S., Lassmann, H., Nishimune, Y. and Berger, J., 2006. A novel  
415 mammalian bubblegum-related acyl-CoA synthetase restricted to testes and possibly  
416 involved in spermatogenesis. *Arch Biochem Biophys* 451, 23-33.

417 Grafflin, A.L. and Green, D.E., 1948. Studies on the cyclophorase system; the complete  
418 oxidation of fatty acids. *J Biol Chem* 176, 95-115.

419 Grygiel-Górniak, B., 2014. Peroxisome proliferator-activated receptors and their ligands:  
420 nutritional and clinical implications - a review. *Nutrition Journal* 13, 17.

421 Guindon, S., Dufayard, J.-F., Lefort, V., Anisimova, M., Hordijk, W. and Gascuel, O., 2010. New  
422 Algorithms and Methods to Estimate Maximum-Likelihood Phylogenies: Assessing the  
423 Performance of PhyML 3.0. *Syst Biol* 59, 307-321.

424 Hisanaga, Y., Ago, H., Nakagawa, N., Hamada, K., Ida, K., Yamamoto, M., Hori, T., Arai, Y.,  
425 Sugahara, M., Kuramitsu, S., Yokoyama, S. and Miyano, M., 2004. Structural basis of the  
426 substrate-specific two-step catalysis of long chain fatty acyl-CoA synthetase dimer. *J*  
427 *Biol Chem* 279, 31717-26.

428 Horswill, A.R. and Escalante-Semerena, J.C., 2002. Characterization of the Propionyl-CoA  
429 Synthetase (PrpE) Enzyme of *Salmonella enterica*: Residue Lys592 Is Required for  
430 Propionyl-AMP Synthesis. *Biochemistry* 41, 2379-2387.

431 Karan, D., Lesbats, M., David, J.R. and Capy, P., 2003. Evolution of the AMP-forming Acetyl-CoA  
432 Synthetase Gene in the Drosophilidae Family. *Journal of Molecular Evolution* 57, S297-  
433 S303.

- 434 Katoh, K., Kuma, K.-i., Toh, H. and Miyata, T., 2005. MAFFT version 5: improvement in accuracy  
435 of multiple sequence alignment. *Nucleic Acids Research* 33, 511-518.
- 436 Katoh, K. and Toh, H., 2008. Recent developments in the MAFFT multiple sequence alignment  
437 program. *Brief Bioinform* 9, 286-98.
- 438 Knox, W.E., Noyce, B.N. and Auerbach, V.H., 1948. Studies on the cyclophorase system: III.  
439 Obligatory Sparking of the fatty acid oxidaton. *Journal of Biological Chemistry* 176, 117-  
440 122.
- 441 Langmead, B. and Salzberg, S.L., 2012. Fast gapped-read alignment with Bowtie 2. *Nat Methods*  
442 9, 357-9.
- 443 Li, B. and Dewey, C.N., 2011. RSEM: accurate transcript quantification from RNA-Seq data with  
444 or without a reference genome. *BMC Bioinformatics* 12, 323.
- 445 Lopes-Marques, M., Cunha, I., Reis-Henriques, M.A., Santos, M.M. and Castro, L.F.C., 2013.  
446 Diversity and history of the long-chain acyl-CoA synthetase (Acsl) gene family in  
447 vertebrates. *BMC Evolutionary Biology* 13, 271.
- 448 Min, K.-T. and Benzer, S., 1999. Preventing Neurodegeneration in the *Drosophila* Mutant  
449 *bubblegum*. *Science* 284, 1985-1988.
- 450 Moriya-Sato, A., Hida, A., Inagawa-Ogashiwa, M., Wada, M.R., Sugiyama, K., Shimizu, J., Yabuki,  
451 T., Seyama, Y. and Hashimoto, N., 2000. Novel Acyl-CoA Synthetase in  
452 Adrenoleukodystrophy Target Tissues. *Biochemical and Biophysical Research*  
453 *Communications* 279, 62-68.
- 454 Moser, H.W., Smith, K.D., Watkins, P.A., Powers, J. and Moser, A.B., 2002. X-linked  
455 adrenoleukodystrophy. In *The metabolic and molecular bases of inherited disease*.  
456 McGraw Hill.
- 457 Ohno, S., 1970. *Evolution by Gene Duplication*, 1 ed. Springer Berlin Heidelberg, New York.
- 458 Pavlidis, P. and Noble, W.S., 2003. Matrix2png: a utility for visualizing matrix data.  
459 *Bioinformatics* 19, 295-6.
- 460 Pei, Z., Jia, Z. and Watkins, P.A., 2006. The second member of the human and murine  
461 bubblegum family is a testis- and brainstem-specific acyl-CoA synthetase. *J Biol Chem*  
462 281, 6632-41.
- 463 Pei, Z., Oey, N.A., Zuidervaart, M.M., Jia, Z., Li, Y., Steinberg, S.J., Smith, K.D. and Watkins, P.A.,  
464 2003. The acyl-CoA synthetase "bubblegum" (lipidosin): further characterization and  
465 role in neuronal fatty acid beta-oxidation. *J Biol Chem* 278, 47070-8.
- 466 Putnam, N.H., Butts, T., Ferrier, D.E.K., Furlong, R.F., Hellsten, U., Kawashima, T., Robinson-  
467 Rechavi, M., Shoguchi, E., Terry, A., Yu, J.-K., Benito-Gutierrez, E., Dubchak, I., Garcia-

- 468 Fernandez, J., Gibson-Brown, J.J., Grigoriev, I.V., Horton, A.C., de Jong, P.J., Jurka, J.,  
469 Kapitonov, V.V., Kohara, Y., Kuroki, Y., Lindquist, E., Lucas, S., Osoegawa, K., Pennacchio,  
470 L.A., Salamov, A.A., Satou, Y., Sauka-Spengler, T., Schmutz, J., Shin-I, T., Toyoda, A.,  
471 Bronner-Fraser, M., Fujiyama, A., Holland, L.Z., Holland, P.W.H., Satoh, N. and Rokhsar,  
472 D.S., 2008. The amphioxus genome and the evolution of the chordate karyotype.  
473 *Nature* 453, 1064-1071.
- 474 Robinson, L. and Mazurak, V., 2013. N-3 Polyunsaturated Fatty Acids: Relationship to  
475 Inflammation in Healthy Adults and Adults Exhibiting Features of Metabolic Syndrome.  
476 *Lipids* 48, 319-332.
- 477 Smith, J.J. and Keinath, M.C., 2015. The sea lamprey meiotic map improves resolution of  
478 ancient vertebrate genome duplications. *Genome Research* 25, 1081-1090.
- 479 Soupene, E. and Kuypers, F.A., 2008. Mammalian long-chain acyl-CoA synthetases. *Exp Biol*  
480 *Med (Maywood)* 233, 507-21.
- 481 Steinberg, S.J., Morgenthaler, J., Heinzer, A.K., Smith, K.D. and Watkins, P.A., 2000. Very Long-  
482 chain Acyl-CoA Synthetases: Human "Bubblegum" represents a new family of proteins  
483 capable of activating Very Long chain Fatty Acids. *Journal of Biological Chemistry* 275,  
484 35162-35169.
- 485 Tang, P.-Z., Tsai-Morris, C.-H. and Dufau, M.L., 2001. Cloning and characterization of a  
486 hormonally regulated rat long chain acyl-CoA synthetase. *Proceedings of the National*  
487 *Academy of Sciences* 98, 6581-6586.
- 488 Tocher, D.R., 2003. Metabolism and Functions of Lipids and Fatty Acids in Teleost Fish. *Reviews*  
489 *in Fisheries Science* 11, 107-184.
- 490 Wall, R., Ross, R.P., Fitzgerald, G.F. and Stanton, C., 2010. Fatty acids from fish: the anti-  
491 inflammatory potential of long-chain omega-3 fatty acids. *Nutrition Reviews* 68, 280-  
492 289.
- 493 Watkins, P.A., Maignel, D., Jia, Z. and Pevsner, J., 2007. Evidence for 26 distinct acyl-coenzyme A  
494 synthetase genes in the human genome. *Journal of Lipid Research* 48, 2736-2750.
- 495 Weimar, J.D., DiRusso, C.C., Delio, R. and Black, P.N., 2002. Functional Role of Fatty Acyl-  
496 Coenzyme A Synthetase in the Transmembrane Movement and Activation of  
497 Exogenous Long-chain Fatty Acids: Amino Acid residues within the ATP/AMP signature  
498 motif of *Escherichia coli* FadD are required for enzyme activity and Fatty acid transport.  
499 *Journal of Biological Chemistry* 277, 29369-29376.
- 500 Yates, A., Akanni, W., Amode, M.R., Barrell, D., Billis, K., Carvalho-Silva, D., Cummins, C.,  
501 Clapham, P., Fitzgerald, S., Gil, L., Girón, C.G., Gordon, L., Hourlier, T., Hunt, S.E.,  
502 Janacek, S.H., Johnson, N., Juettemann, T., Keenan, S., Lavidas, I., Martin, F.J., Maurel,  
503 T., McLaren, W., Murphy, D.N., Nag, R., Nuhn, M., Parker, A., Patricio, M., Pignatelli, M.,  
504 Rahtz, M., Riat, H.S., Sheppard, D., Taylor, K., Thormann, A., Vullo, A., Wilder, S.P.,  
505 Zадissa, A., Birney, E., Harrow, J., Muffato, M., Perry, E., Ruffier, M., Spudich, G.,

- 506 Trevanion, S.J., Cunningham, F., Aken, B.L., Zerbino, D.R. and Flicek, P., 2016. Ensembl  
507 2016. Nucleic Acids Research 44, D710-D716.
- 508 Zhang, J., 2003. Evolution by gene duplication: an update. Trends in Ecology & Evolution 18,  
509 292-298.
- 510 Zheng, Y., Zhou, Z.M., Min, X., Li, J.M. and Sha, J.H., 2005. Identification and characterization of  
511 the BGR-like gene with a potential role in human testicular  
512 development/spermatogenesis. Asian J Androl 7, 21-32.
- 513 Zou, Z., DiRusso, C.C., Ctrnacta, V. and Black, P.N., 2002. Fatty acid transport in *Saccharomyces*  
514 *cerevisiae*. Directed mutagenesis of FAT1 distinguishes the biochemical activities  
515 associated with Fat1p. J Biol Chem 277, 31062-71.

516

517

## 518 **Figure captions**

519

520 **Figure 1:** Maximum likelihood phylogenetic analysis of ACSBG amino acid sequences  
521 rooted with the invertebrate clade. Numbers at nodes indicate posterior probabilities  
522 calculated using aBayes.

523

524 **Figure 2:** Comparative genomic maps of vertebrate *ACSBG1* (A) *ACSBG2* (B) and  
525 *ACSBG3* (C and D) gene *loci*. Paralogy analysis and invertebrate genomic maps of ACSBG  
526 (E and F).

527

528 **Figure 3:** Sequence alignment and ACS Motif analysis. **A-** Sequence logo graphs of the  
529 consensus sequences of all ACSBG sequences recovered excluding mammal specific  
530 ACSBG2b acyl-coenzyme A sequences, totalizing 104 sequences. **B-** Sequence logo  
531 graphs of the consensus sequences of all mammalian specific ACSBG2b (17 sequences).  
532 Overall height of the stack reflects the degree of conservation, the height of each letter  
533 represents relative frequency of a given residue in a specific position. Black arrow  
534 highlights the highly conserved arginine residue (Pei et al., 2006) and corresponding  
535 position in ACSBG2b **C-** Heatmap of the relative expression of *ACSBG1* *ACSBG2* and  
536 *ACSBG3* obtained from RNA-seq analysis and visualized using Matrix2png (Pavlidis and  
537 Noble, 2003). **D-** Tissue expression profile of *X. tropicalis* ACSBG genes.

538

539 **Figure 4:** Proposed evolutionary history of the ACSBG gene family in vertebrates.  
540 Yellow corresponds to *ACSBG1* blue *ACSBG2* and green *ACSBG3*. Grey full lined circles  
541 with question marks indicate unknown or unresolved if gene is present, grey circles  
542 dashed lined indicate gene loss. Black line under genes indicates tandem duplication.

543

544

545 **Supplementary material 1:** Table containing ACSBG sequences accession numbers.

546 **Supplementary material 2:** Accession numbers of the RNAseq files retrieved for  
547 expression analysis.

548

549 **Supplementary material 3:** Genome and GTF files retrieved from Ensemble database  
550 (Release 89) and Transcriptome files retrieved from NCBI used on this study and  
551 accession numbers of reference genes.

552

553 **Supplementary material 4:** Complementary phylogenetic analysis of ACSBG sequences  
554 including amphibian uncharacterized truncated ACSBG-like sequences indicated in red.

555

556 **Supplementary material 5:** Motif sequence alignment of the full dataset used 121  
557 ACSBG sequences. Red box highlights mammal specific ACSBG2b.

558

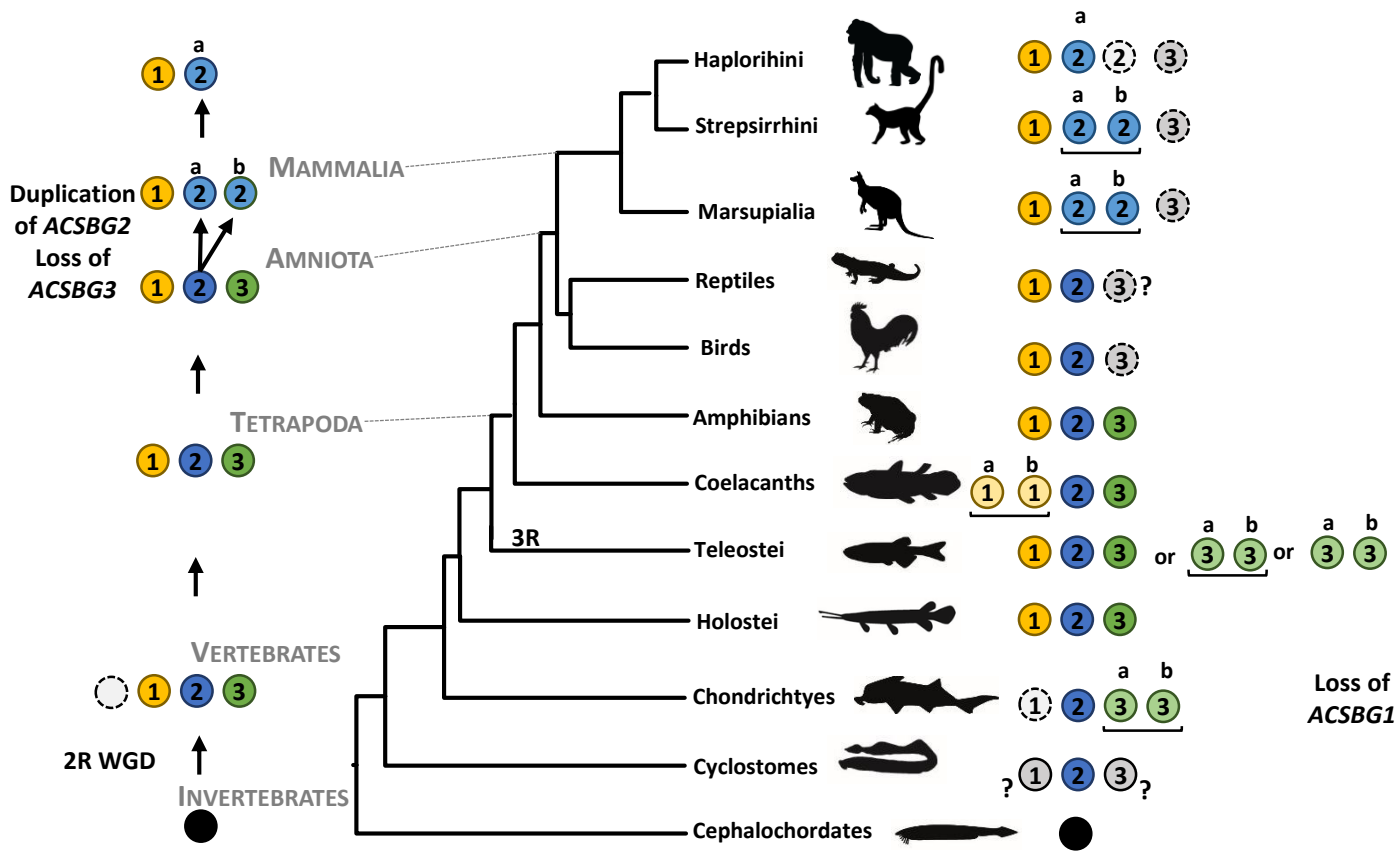

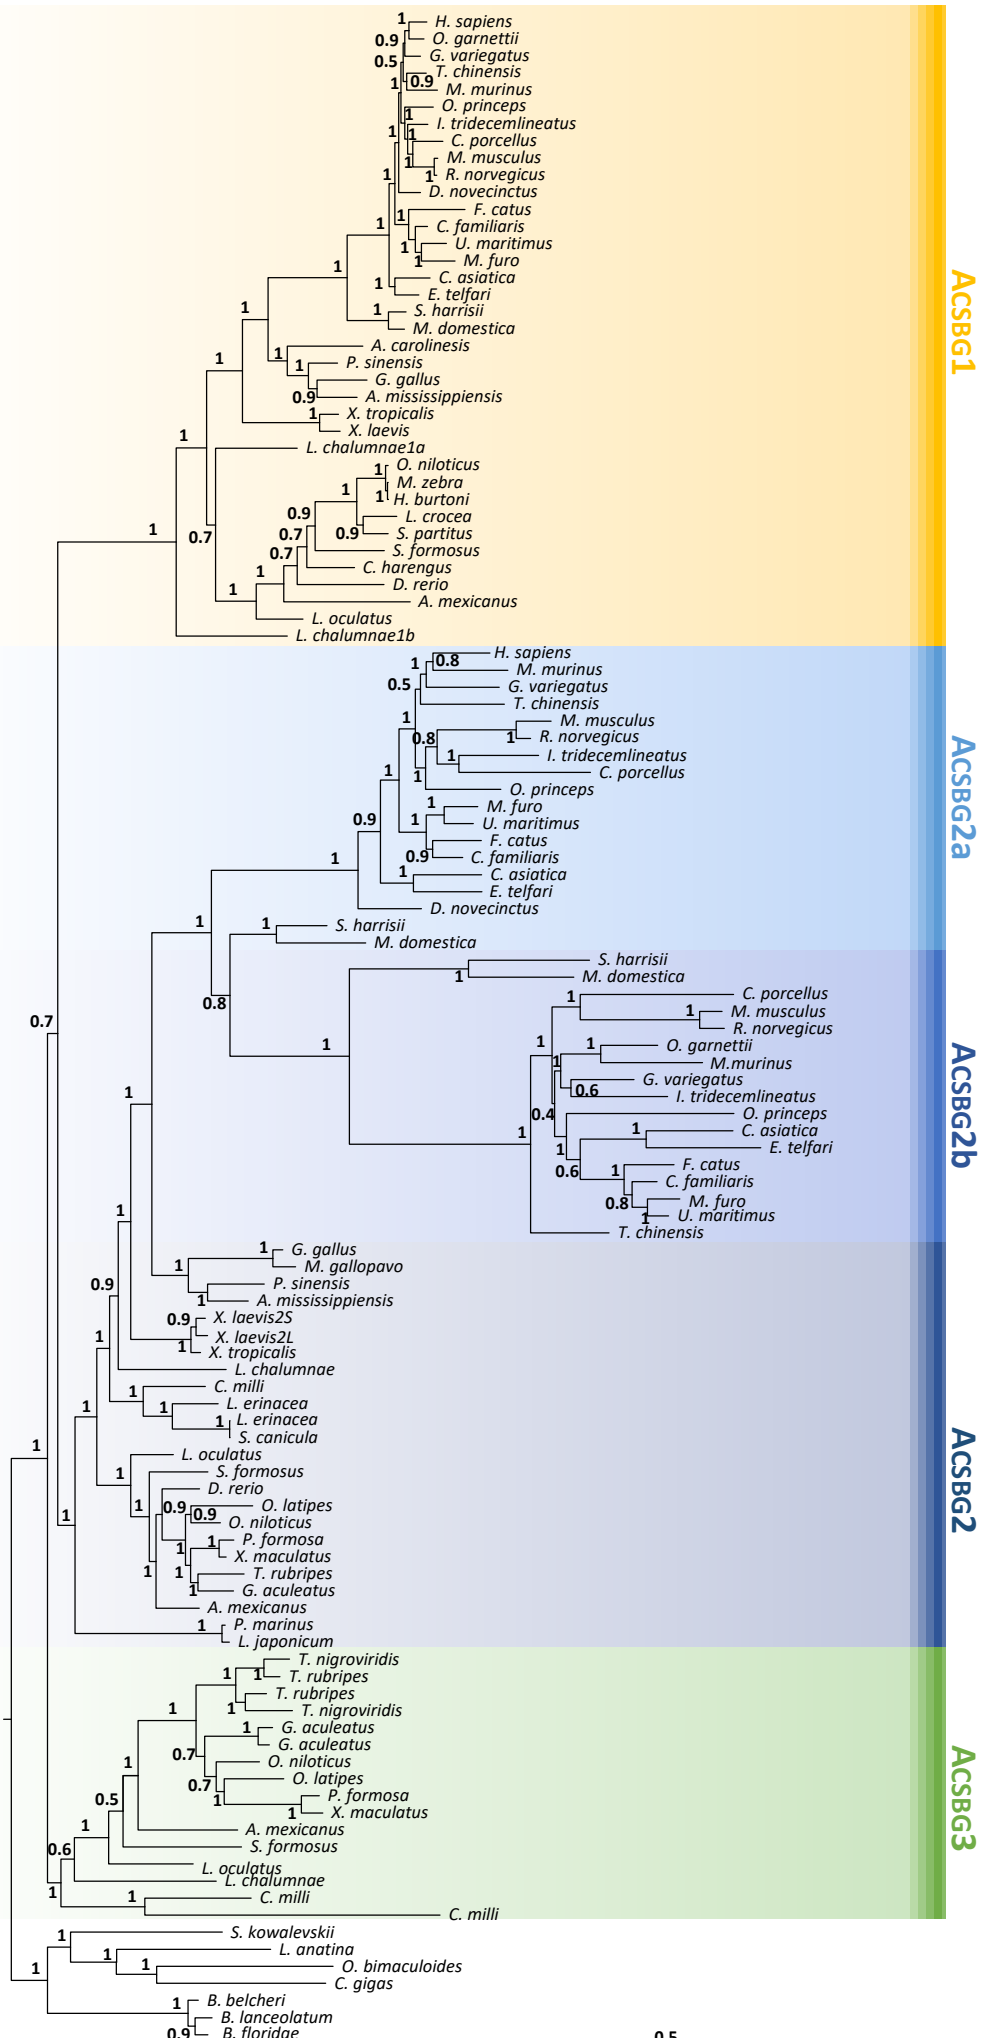

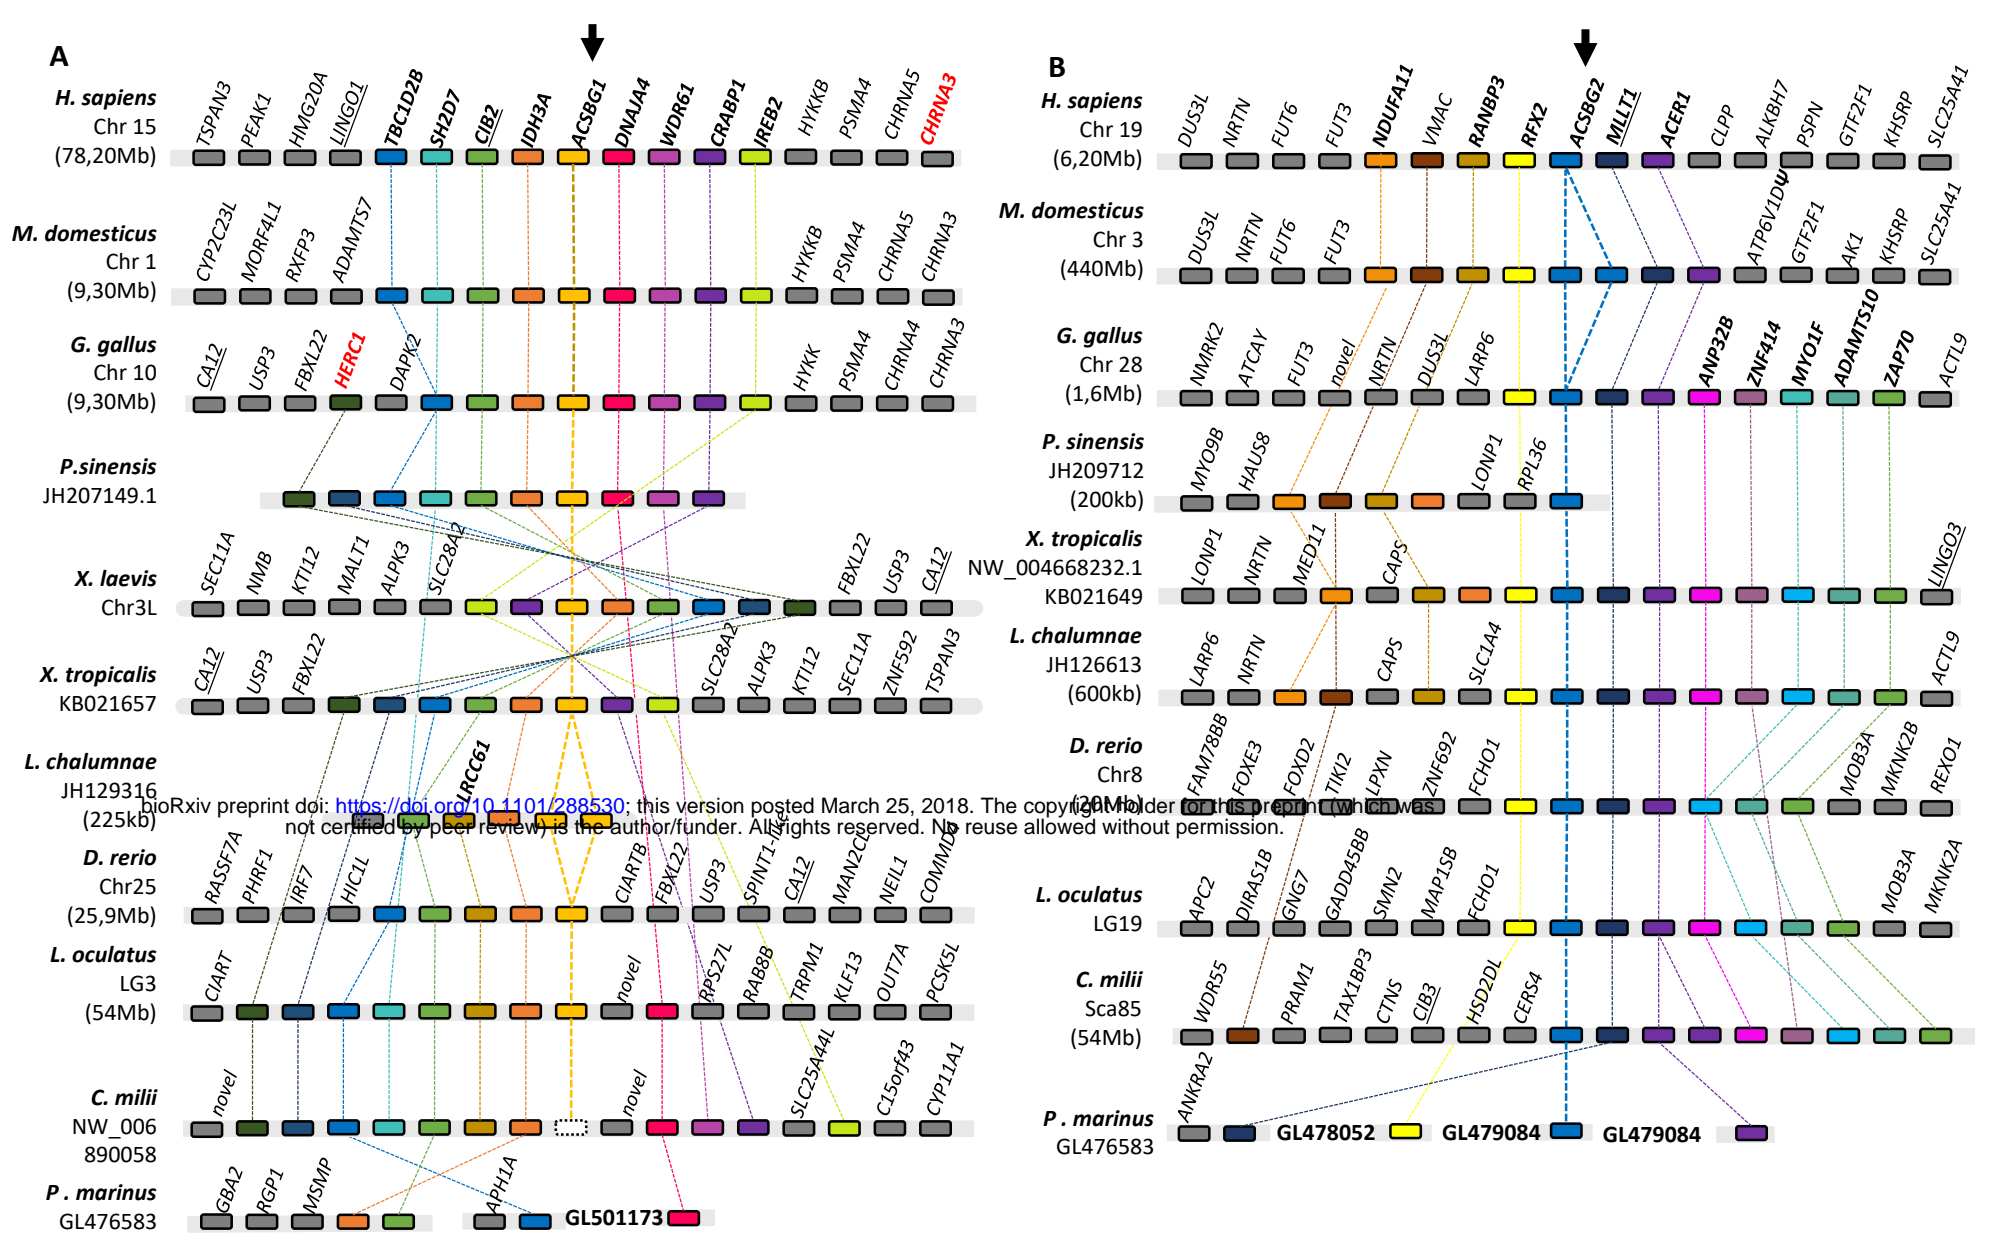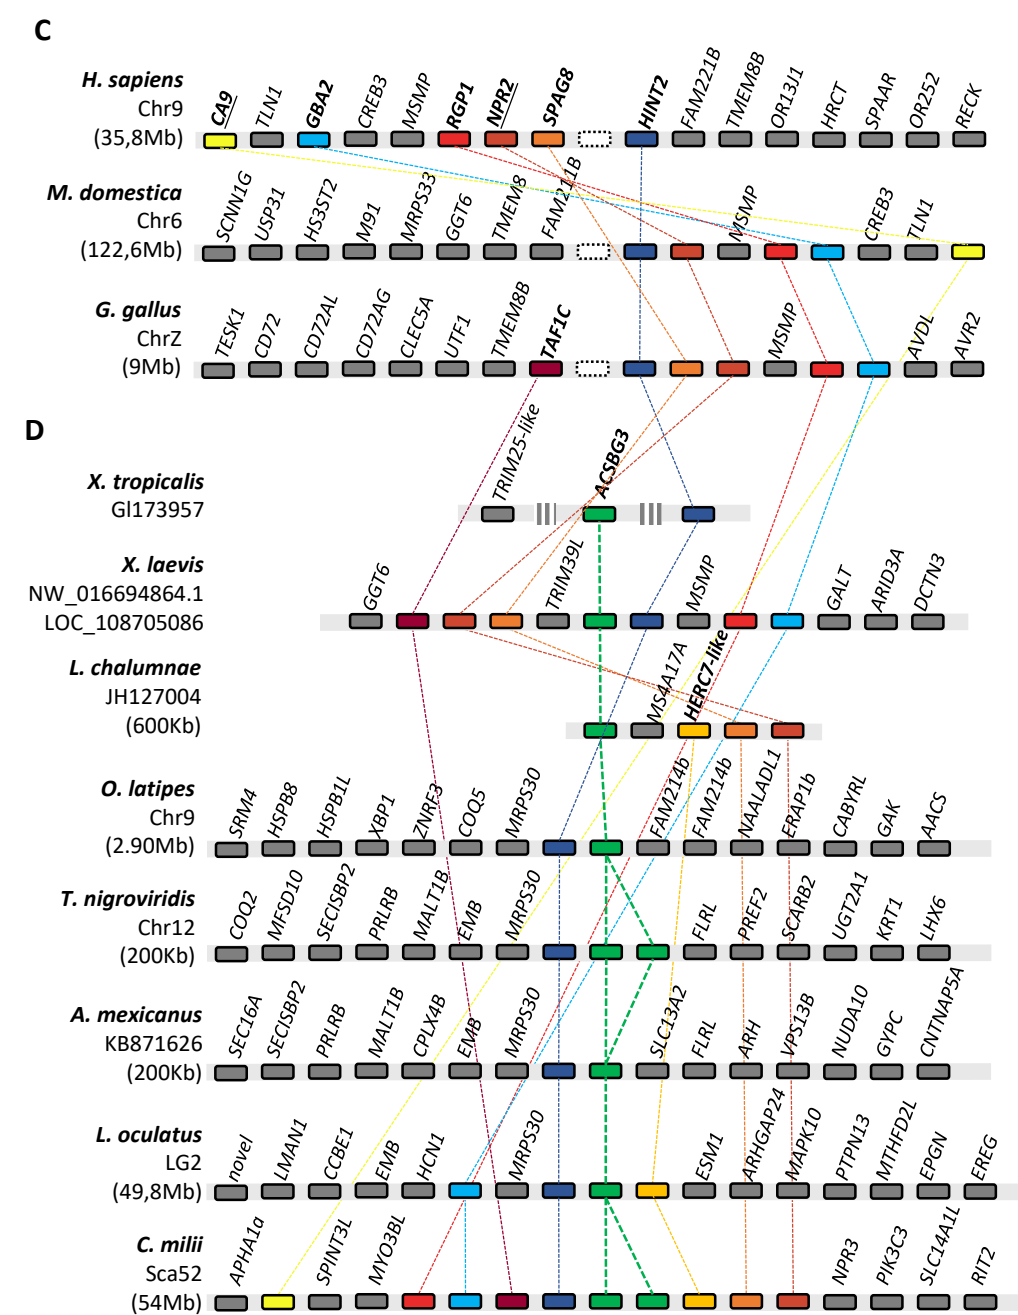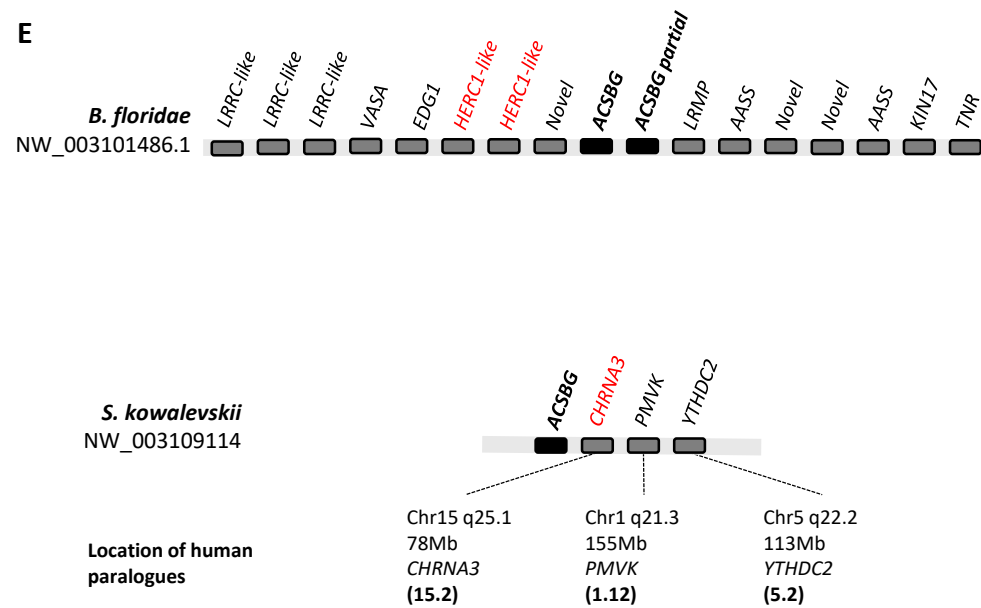



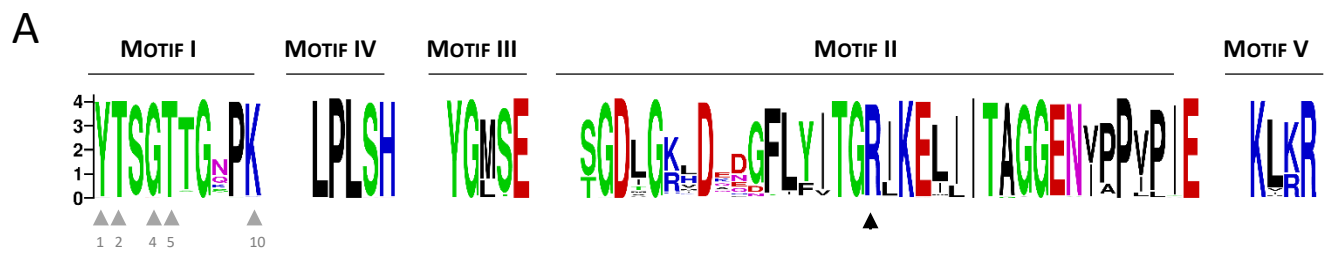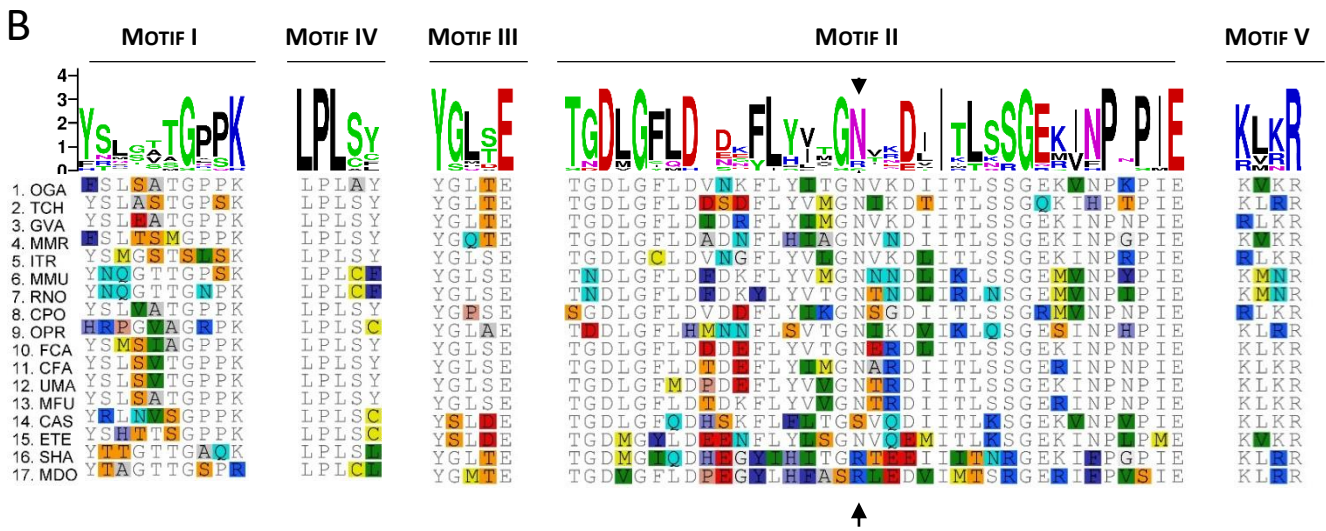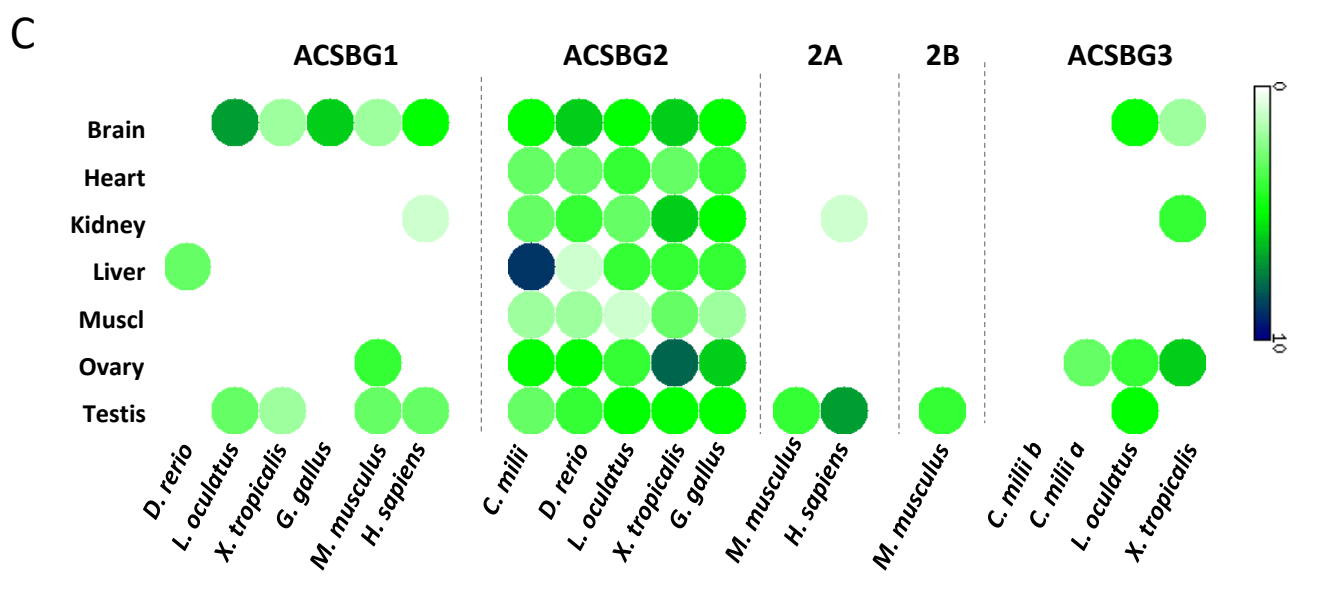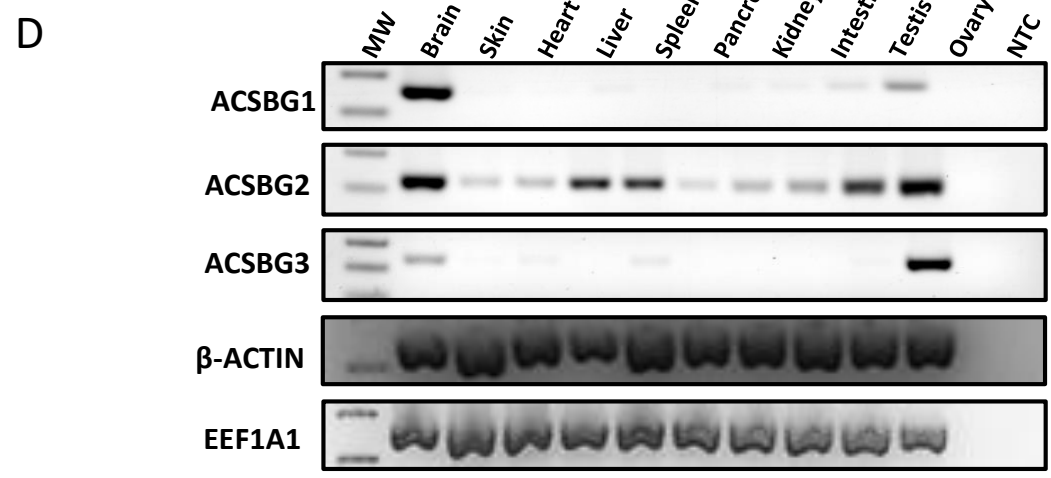

Source: https://www.biorxiv.org/content/10.1101/288530v1.full.pdf
